# Supplementary material
Source: PubMed Central journal article supplement (PMC4974110)
Supplement: mmc1.pdf [file mmc1.pdf]

**Supplemental Data**

**Biallelic Mutations in Citron Kinase**

**Link Mitotic Cytokinesis to Human**

**Primary Microcephaly**

**Hongda Li, Stephanie L. Bielas, Maha S. Zaki, Samira Ismail, Dorit Farfara, Kyongmi Um, Rasim O. Rosti, Eric C. Scott, Shu Tu, Neil C. Chi, Stacey Gabriel, Emine Z. Erson-Omay, A. Gulhan Ercan-Sencicek, Katsuhito Yasuno, Ahmet Okay Çağlayan, Hande Kaymakçalan, Barış Ekici, Kaya Bilguvar, Murat Gunel, and Joseph G. Gleeson**

## Supplemental Data

Supplemental Data include 3 figures and 2 tables.

### Figure S1

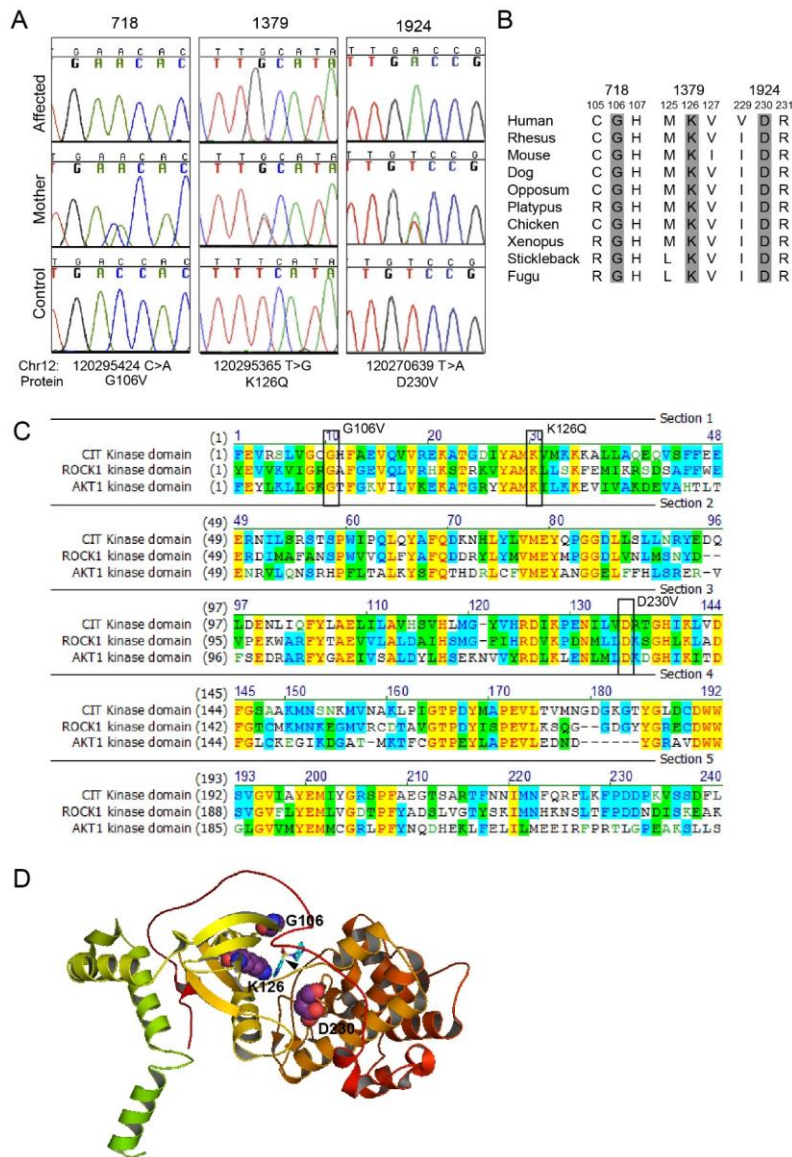

### Figure S1. Mutations in the kinase domain of CIT-K cause primary microcephaly

(A) Sequencing chromatograms illustrating *CIT* mutations in the affected children. (B) Evolutionary conservation of the residues with patient mutations across the animal kingdom. (C) Kinase domain conservation among CIT-K and other AGC kinases. The residues with patient mutations are marked with black boxes. The sequence alignment was performed using Vector NTI (Invitrogen). (D) The crystal structure of the kinase domain of ROCK1, with residues with patient mutations labeled. Hydroxyfasudil, a competitive inhibitor of ATP, is marked with arrowhead showing the ATP binding pocket. The kinase domain and residues of ROCK1 were viewed by PyMol (<https://www.pymol.org>).

**Figure S2**

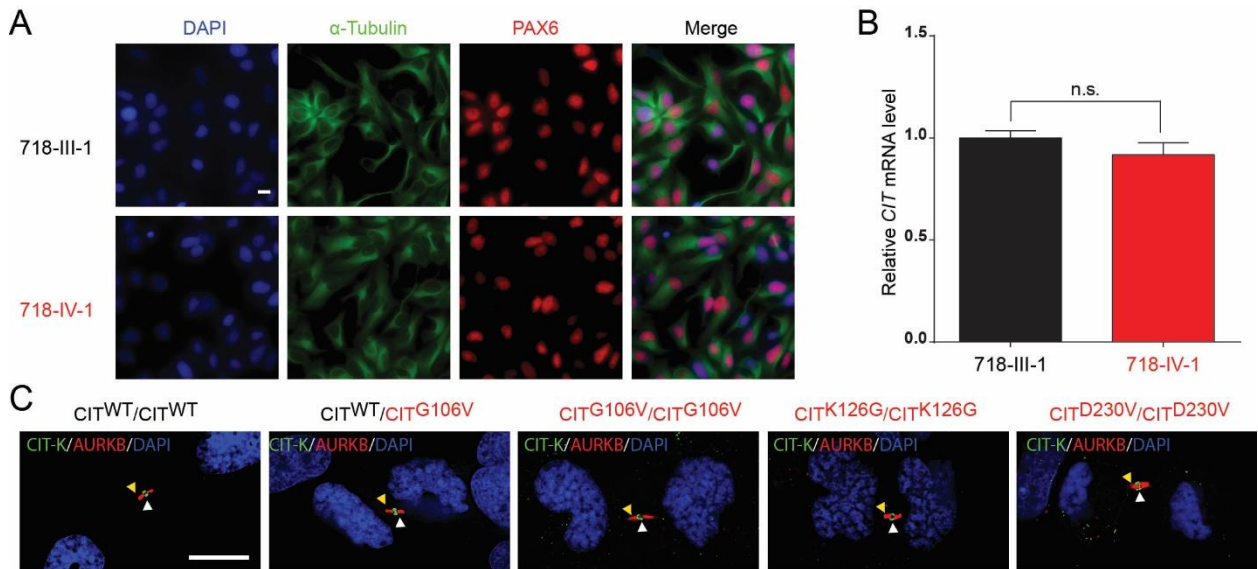

**Figure S2. Expression level and localization of CIT-N in patient-derived NPCs**

(A) Representative immunocytochemistry images of PAX6+ NPCs differentiated from iPSCs. Scale bar = 10 $\mu$ m. (B) Relative mRNA level of *CIT* in affected and control NPCs. (n=3 cultures for each group). Student's t test. Bar graph: mean  $\pm$  s.e.m (C) Representative immunocytochemistry images for CIT-K (white arrowhead) and midbody marker Aurora kinase B (AURKB) (yellow arrowhead) during cytokinesis in NPCs with absent, heterozygous or homozygous *CIT* mutations. The localization of CIT-K and AURKB was indistinguishable among all conditions. Scale bar = 10 $\mu$ m.

**Figure S3**

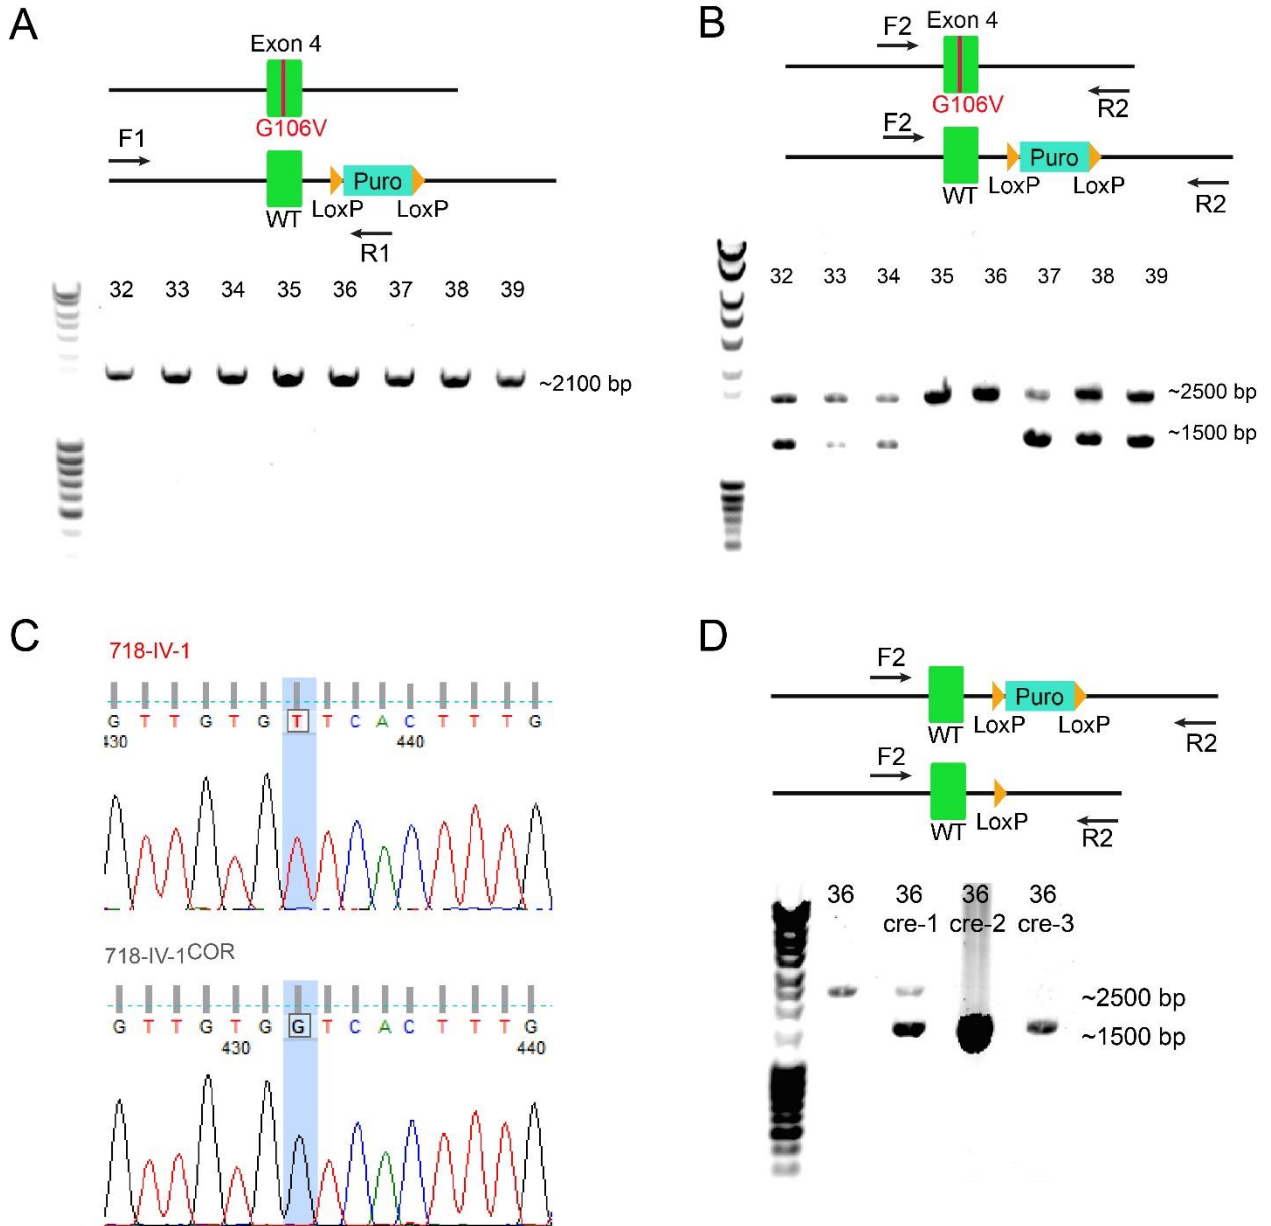

**Figure S3. Identification of correctly-targeted iPSC clones in genome editing**

(A) Forward primer F1 outside the 5' recombination arm, reverse primer R1 inside the puromycin cassette. This PCR allowed identification of iPSC clones with homologous targeting vector recombination. (B) Forward (F2) and reverse (R2) primers outside of Exon4 and the puromycin cassette. A ~2500 bp band represented the recombined allele, and a ~1500bp band represented the unmodified allele. Clone #35 and #36 were homozygous for homologous recombination, and were chosen for downstream studies. (C) Sanger sequencing confirmed c.317G>T mutation corrected in clone #36. (D) PCR identification of clones with LoxP-Puro-LoxP cassette removal. A ~2500 bp band represented the corrected allele, and a ~1500bp band represented removal of the LoxP-Puro-LoxP cassette. Clone #36-2 and #36-3, with LoxP-Puro-LoxP cassette removal on both alleles, were used for downstream studies.



**Table S1 Genetic variants identified in each family from exome sequencing**

**Family 718**

| chrom | pos       | dbSNP       | ref | mut | gene     | functionGVS | cDNA Position | AA_Change | PolyPhen Val | SIFTval | CADD PHRED | accession      |
|-------|-----------|-------------|-----|-----|----------|-------------|---------------|-----------|--------------|---------|------------|----------------|
| 3     | 98620028  |             | G   | A   | DCBLD2   | missense    | 143           | PRO/LEU   | 0.118        | 0.5     | 20.6       | NM_080927.3    |
| 3     | 112729916 | rs115971253 | C   | T   | C3orf17  | missense    | 889           | VAL/ILE   | 0.165        | 0.08    | 12.29      | NM_015412.3    |
| 3     | 113377150 |             | C   | A   | KIAA2018 | missense    | 3380          | VAL/LEU   | 0.05         | 0.05    | 23         | NM_001009899.2 |
| 3     | 122274792 |             | T   | C   | PARP9    | missense    | 331           | ARG/GLY   | 0.467        | 0.01    | 24         | NM_031458.2    |
| 3     | 124141662 |             | T   | C   | KALRN    | missense    | 2540          | ILE/THR   | 0.596        | 0.02    | 26.4       | NM_003947.4    |
| 10    | 23399192  |             | A   | G   | MSRB2    | missense    | 241           | ASN/ASP   | 0.051        | 0.65    | 11.51      | NM_012228.3    |
| 10    | 25313059  | rs116200992 | G   | T   | THNSL1   | missense    | 907           | ALA/SER   | 0.169        | 0.49    | 11.04      | NM_024838.4    |
| 10    | 27389200  |             | C   | A   | ANKRD26  | missense    | 56            | ARG/LEU   | 0.003        | 0.72    | 10.13      | NM_014915.2    |
| 10    | 30317861  |             | C   | G   | KIAA1462 | missense    | 1220          | GLY/ARG   | 0.971        | 0.01    | 23.8       | NM_020848.2    |
| 12    | 120295424 |             | C   | A   | CIT      | missense    | 317           | GLY/VAL   | 1            | 0       | 32         | NM_007174.2    |
| 12    | 122748141 | rs114821540 | T   | G   | VPS33A   | missense    | 274           | ILE/LEU   | 0.058        | 0.89    | 15.87      | NM_022916.4    |
| 16    | 89347612  | rs75362060  | C   | T   | ANKRD11  | missense    | 5340          | ALA/THR   | 0.002        | 0.95    | 0.024      | NM_013275.4    |

**Family 1379**

| chrom | pos       | dbSNP       | ref | mut | gene      | functionGVS  | cDNA Position | AA_Change | PolyPhen Val | SIFTval | PHRED | accession      |
|-------|-----------|-------------|-----|-----|-----------|--------------|---------------|-----------|--------------|---------|-------|----------------|
| 1     | 230846446 |             | A   | G   | AGT       | missense     | 151           | CYS/ARG   | 0.987        | 0.01    | 23.7  | NM_000029.3    |
| 1     | 234565060 |             | G   | A   | TARBP1    | missense     | 2882          | SER/PHE   | 0.736        | 0.04    | 28.3  | NM_005646.3    |
| 2     | 179203724 |             | C   | T   | OSBPL6    | missense     | 734           | ALA/VAL   | 0.999        | 0.13    | 28.2  | NM_145739.2    |
| 2     | 179457681 | rs116592778 | A   | G   | TTN       | missense     | 32546         | VAL/ALA   | NA           | NA      | 14.63 | NM_133437.3    |
| 2     | 186664898 |             | A   | G   | FSIP2     | missense     | 11132         |           | 0.023        | 0.02    | 18.14 |                |
| 2     | 231380146 | rs61733089  | G   | A   | SP100     | missense     | 2431          | ALA/THR   | NA           | NA      | 4.163 | NM_003113.3    |
| 3     | 73024182  |             | T   | C   | GXYLT2    | missense     | 1204          | PHE/LEU   | 0.411        | 1       | 16.73 | NM_001080393.1 |
| 4     | 9336408   |             | A   | G   | _OC728375 | missense     | 25            | ARG/GLY   | 0            | 1       | 0.002 | NM_001242328.1 |
| 5     | 75596565  |             | T   | C   | SV2C      | missense     | 1648          | TYR/HIS   | 0.827        | 0.5     | 24.2  | NM_014979.1    |
| 5     | 79025441  |             | C   | T   | CMYA5     | missense     | 853           | ARG/CYS   | 0.046        | 0.02    | 13.24 | NM_153610.3    |
| 5     | 89930940  |             | G   | A   | GPR98     | missense     | 1849          | VAL/MET   | 0.038        | 0.03    | 23.1  | NM_032119.3    |
| 5     | 135513083 |             | A   | AT  | SMAD5     | frameshift   | 0             |           | 0.069        | 0.12    | 12.56 |                |
| 10    | 103900766 | rs17855877  | C   | G   | PPRC1     | missense     | 2501          | PRO/ARG   | 0.787        | 0.04    | 23.2  | NM_015062.3    |
| 10    | 124091985 |             | A   | G   | BTBD16    | missense     | 1121          | ASP/GLY   | 0.997        | 0.02    | 33    | NM_144587.2    |
| 10    | 125521435 | rs112981683 | T   | C   | CPXM2     | missense     | 1730          | LYS/ARG   | 1            | 0.06    | 23    | NM_198148.2    |
| 11    | 78369281  |             | C   | T   | ODZ4      | missense     | 8132          | ARG/GLN   | 0.013        | 0.28    | 23.1  | NM_001098816.2 |
| 11    | 111228529 | rs35664667  | T   | C   | POU2AF1   | missense     | 181           | THR/ALA   | 0.012        | 0.46    | 6.234 | NM_006235.2    |
| 12    | 120295365 |             | T   | G   | CIT       | missense     | 376           | LYS/GLN   | 1            | 0       | 26.7  | NM_007174.2    |
| 12    | 121853964 |             | G   | A   | RNF34     | ling-synonym | 12            |           | NA           | NA      | 16.6  | NM_194271.1    |
| 14    | 105417500 |             | C   | T   | AHNAK2    | missense     | 4288          | GLU/LYS   | 0.086        | 0.2     | 3.783 | NM_138420.2    |
| 20    | 3804572   |             | G   | T   | C20orf29  | missense     | 231           | MET/ILE   | 0.003        | 0.39    | 10.15 | NM_018347.2    |
| 20    | 3843058   |             | C   | A   | MAVS      | missense     | 623           | ALA/GLU   | 0.522        | 0.01    | 23.5  | NM_020746.4    |
| 21    | 33694796  |             | C   | T   | URB1      | missense     | 5332          | ASP/ASN   | 0.127        | 0.15    | 22    | NM_014825.2    |
| 21    | 37444851  |             | G   | C   | _LOC1001  | missense     | 505           |           | 0.05         | 0.22    | 20.4  | NM_001757.2    |
| 21    | 43287457  |             | TC  | T   | PRDM15    | frameshift   | 0             |           | NA           | NA      | 12.37 |                |
| 21    | 43531659  |             | C   | T   | UMODL1    | missense     | 2327          | PRO/LEU   | 0.851        | 0.08    | 19.24 | NM_173568.3    |

**Family 1924**

| chrom | pos       | dbSNP       | ref | mut | gene      | functionGVS  | cDNA Position | AA_Change   | PolyPhen Val | SIFT val | PHRED | Accession      |
|-------|-----------|-------------|-----|-----|-----------|--------------|---------------|-------------|--------------|----------|-------|----------------|
| 2     | 179440696 | rs55853138  | C   | T   | TTN       | missense     | 43568         | Arg14448Gln | 1            | 0.006    | 23.6  | NM_133432.3    |
| 2     | 190338924 |             | G   | A   | WDR75     | missense     | 2122          | Glu688Lys   | 0.998        | 0.04     | 35    | NM_032168.1    |
| 2     | 190338928 |             | G   | A   | WDR75     | missense     | 2126          | Ser689Asn   | 0.966        | 0.313    | 21.8  | NM_032168.1    |
| 3     | 51749962  | rs151188856 | G   | A   | GRM2      | missense     | 2412          | Asp725Asn   | 1            | 0.017    | 33    | NM_000839.3    |
| 3     | 49849583  |             | C   | T   | UBA7      | missense     | 922           | Gly251Arg   | 0.999        | 0        | 25.4  | NM_003335.2    |
| 12    | 123444667 |             | C   | T   | ABC89     | missense     | 426           | Arg39His    | 0.968        | 0.138    | 29.9  | NM_019625.3    |
| 12    | 120270639 |             | T   | A   | CIT       | missense     | 745           | Asp230Val   | 0.98         | 0        | 35    | NM_001206999.1 |
| 12    | 120884493 | rs149168717 | C   | T   | G0000025  | missense     | 158           | His39Tyr    | 0.085        | 0.454    | 22.8  | NM_176818.2    |
| 12    | 120662133 |             | G   | A   | PXN       | missense     | 918           | Arg19Trp    | 0.999        | 0.001    | 25.1  | XM_005253915.1 |
| 13    | 95673848  |             | A   | G   | ABCC4     | missense     | 4078          | Ile1320Thr  | 0.954        | 0.002    | 23.2  | NM_005845.3    |
| 18    | 580778    |             | A   | G   | CETN1     | missense     | 410           | Lys124Glu   | 0.017        | 0.108    | 14.51 | NM_004066.1    |
| 19    | 41198211  | rs144343899 | T   | C   | ADCK4     | missense     | 1431          | Tyr455Cys   | 0.998        | 0        | 22    | XM_005259272.1 |
| 19    | 41205970  |             | AC  | C   | ADCK4     | splice_donor |               |             |              |          | 27.1  |                |
| 19    | 40964447  | rs144111604 | C   | T   | BLVRB     | missense     | 195           | Glu29Lys    | 0.013        | 0.56     | 25.4  | XM_005259157.1 |
| 19    | 47883001  | rs200643374 | A   | G   | DHX34     | missense     | 3090          | Asn914Ser   | 0.028        | 0.145    | 35    | NM_014681.5    |
| 19    | 44536034  |             | C   | A   | ZNF222    | stop_gained  | 422           | Cys109X     |              |          | 11.1  | NM_001129996.1 |
| X     | 79979316  |             | A   | C   | BRWD3     | missense     | 1844          | His527Gln   | 0.743        | 0.251    | 22.9  | NM_153252.4    |
| X     | 131203569 |             | G   | A   | G00000134 | missense     | 908           | Asp221Asn   | 0.07         | 0.08     | 26.5  | XM_005262424.1 |

Abbreviations. Chrom, chromosome; pos, position; ref, reference; mut, mutation.

## Table S2 Additional variants identified in 1379-B1-1 from exome sequencing

We identified additional compound heterozygous variants and dominant variants in subject 1379-B1-1.

### Compound heterozygous variants

| CHROM | POS       | effect                            | gene_name | dbSNP       | HGVS_c               | HGVS_p               | transcript_id   | impact   |
|-------|-----------|-----------------------------------|-----------|-------------|----------------------|----------------------|-----------------|----------|
| 2     | 201488623 | missense_variant                  | AOX1      | rs369839297 | c.2041G>A            | p.Asp681Asn          | ENST00000374700 | MODERATE |
| 2     | 201501730 | missense_variant                  | AOX1      | rs144419430 | c.2443G>A            | p.Gly815Arg          | ENST00000374700 | MODERATE |
| 6     | 157488190 | missense_variant                  | ARID1B    | rs34786733  | c.2857G>A            | p.Gly953Ser          | ENST00000350026 | MODERATE |
| 6     | 157522223 | missense_variant                  | ARID1B    | rs34870395  | c.4456A>T            | p.Met1486Leu         | ENST00000350026 | MODERATE |
| 2     | 29287937  | splice_region_variant             | C2orf71   |             | c.3669-5_3669-4insCA |                      | ENST00000331664 | LOW      |
| 2     | 29287938  | splice_region_variant             | C2orf71   |             | c.3669-6_3669-5insA  |                      | ENST00000331664 | LOW      |
| 1     | 17256337  | splice_region_variant             | CROCC     |             | c.352-4G>A           |                      | ENST00000375541 | LOW      |
| 1     | 17256531  | splice_region_variant             | CROCC     | rs371339969 | c.537+5G>A           |                      | ENST00000375541 | LOW      |
| 1     | 156499967 | missense_variant                  | IQGAP3    | rs149623112 | c.4334G>A            | p.Arg1445His         | ENST00000361170 | MODERATE |
| 1     | 156520100 | missense_variant                  | IQGAP3    | rs59573847  | c.1778G>T            | p.Arg593Leu          | ENST00000361170 | MODERATE |
| 16    | 4714702   | splice_region_variant             | MGRN1     | rs199769383 | c.562-8C>G           |                      | ENST00000262370 | LOW      |
| 16    | 4733217   | splice_region_variant             | MGRN1     | rs200737185 | c.1483-8T>C          |                      | ENST00000262370 | LOW      |
| 3     | 195512549 | inframe_deletion                  | MUC4      |             | c.5854_5901delCCTCTT | p.Pro1952_Thr1967del | ENST00000463781 | MODERATE |
| 3     | 195518118 | frameshift_variant                | MUC4      |             | c.326_332delATGTGAT  | p.Asn109fs           | ENST00000463781 | HIGH     |
| 5     | 141324975 | missense_variant                  | PCDH12    | rs3833449   | c.3526G>A            | p.Gly1176Ser         | ENST00000231484 | MODERATE |
| 5     | 141324976 | missense_variant                  | PCDH12    | rs13188049  | c.3525A>C            | p.Arg1175Ser         | ENST00000231484 | MODERATE |
| 10    | 3187831   | missense_variant                  | PITRM1    | rs34837384  | c.2120G>A            | p.Arg707Gln          | ENST00000451104 | MODERATE |
| 10    | 3214939   | missense_variant                  | PITRM1    | rs199766052 | c.26G>T              | p.Gly9Val            | ENST00000380989 | MODERATE |
| 9     | 8331582   | frameshift_variant&stop_gained    | PTPRD     | rs200157286 | c.4303_4304insT      | p.Ser1435fs          | ENST00000397611 | HIGH     |
| 9     | 8331584   | stop_gained&splice_region_variant | PTPRD     |             | c.4302C>A            | p.Cys1434*           | ENST00000397611 | HIGH     |
| 19    | 50037548  | missense_variant                  | RCN3      |             | c.341T>A             | p.Ile114Lys          | ENST00000270645 | MODERATE |
| 19    | 50040307  | missense_variant                  | RCN3      | rs77227069  | c.463G>A             | p.Val155Met          | ENST00000270645 | MODERATE |
| 15    | 42977810  | missense_variant                  | STARD9    | rs140924205 | c.4034T>G            | p.Ile1345Ser         | ENST00000290607 | MODERATE |
| 15    | 42978141  | missense_variant                  | STARD9    | rs376229251 | c.4365A>C            | p.Glu1455Asp         | ENST00000290607 | MODERATE |
| 15    | 42977810  | missense_variant                  | STARD9    | rs140924205 | c.4034T>G            | p.Ile1345Ser         | ENST00000290607 | MODERATE |
| 15    | 42982583  | missense_variant                  | STARD9    | rs115491632 | c.8807G>T            | p.Gly2936Val         | ENST00000290607 | MODERATE |
| 15    | 42978141  | missense_variant                  | STARD9    | rs376229251 | c.4365A>C            | p.Glu1455Asp         | ENST00000290607 | MODERATE |
| 15    | 42982583  | missense_variant                  | STARD9    | rs115491632 | c.8807G>T            | p.Gly2936Val         | ENST00000290607 | MODERATE |
| 6     | 152623062 | missense_variant                  | SYNE1     | rs150376715 | c.17270C>G           | p.Thr5757Arg         | ENST00000423061 | MODERATE |
| 6     | 152647218 | missense_variant                  | SYNE1     | rs35493783  | c.15100G>A           | p.Asp5034Asn         | ENST00000423061 | MODERATE |

Abbreviations. Chrom, chromosome; pos, position; ref, reference; mut, mutation; HGVS, Human Genome Variation Society; HGVS\_c, cDNA location; HGVS\_p, protein location.



## Dominant variants

| CHROM | POS       | effect                | gene_name | dbSNP       | HGVS_c            | HGVS_p       | transcript_id   | impact   |
|-------|-----------|-----------------------|-----------|-------------|-------------------|--------------|-----------------|----------|
| 1     | 1254762   | stop_gained           | CPSF3L    |             | c.256A>T          | p.Lys86*     | ENST00000545578 | HIGH     |
| 1     | 120277963 | missense_variant      | PHGDH     |             | c.689G>A          | p.Arg230His  | ENST00000369409 | MODERATE |
| 1     | 156499967 | missense_variant      | IQGAP3    | rs149623112 | c.4334G>A         | p.Arg1445His | ENST00000361170 | MODERATE |
| 1     | 156520100 | missense_variant      | IQGAP3    | rs59573847  | c.1778G>T         | p.Arg593Leu  | ENST00000361170 | MODERATE |
| 2     | 74274744  | missense_variant      | TET3      | rs148646838 | c.1295T>C         | p.Val432Ala  | ENST00000409262 | MODERATE |
| 2     | 110922668 | missense_variant      | NPHP1     | rs113450177 | c.503C>T          | p.Ala168Val  | ENST00000355301 | MODERATE |
| 2     | 152483510 | splice_region_variant | NEB       | rs141088433 | c.10347+6C>T      |              | ENST00000397345 | LOW      |
| 2     | 171240217 | splice_region_variant | MYO3B     | rs146172688 | c.1186-3C>T       |              | ENST00000408978 | LOW      |
| 2     | 201488623 | missense_variant      | AOX1      | rs369839297 | c.2041G>A         | p.Asp681Asn  | ENST00000374700 | MODERATE |
| 3     | 45049073  | splice_region_variant | EXOSC7    | rs145650051 | c.771+6G>A        |              | ENST00000265564 | LOW      |
| 3     | 47452676  | missense_variant      | PTPN23    | rs138329311 | c.3388G>A         | p.Gly1130Ser | ENST00000265562 | MODERATE |
| 3     | 52430897  | missense_variant      | DNAH1     |             | c.11624C>T        | p.Thr3875Met | ENST00000420323 | MODERATE |
| 3     | 186947662 | missense_variant      | MASP1     |             | c.1327C>T         | p.Arg443Trp  | ENST00000337774 | MODERATE |
| 5     | 98115646  | stop_gained           | RGMB      | rs201449079 | c.622G>T          | p.Gly208*    | ENST00000308234 | HIGH     |
| 5     | 141324975 | missense_variant      | PCDH11    | rs3833449   | c.3526G>A         | p.Gly1176Ser | ENST00000231484 | MODERATE |
| 5     | 141324976 | missense_variant      | PCDH12    | rs13188049  | c.3525A>C         | p.Arg1175Ser | ENST00000231484 | MODERATE |
| 6     | 56342136  | splice_region_variant | DST       | rs34892827  | c.13806+7G>A      |              | ENST00000244364 | LOW      |
| 6     | 152623062 | missense_variant      | SYNE1     | rs150376715 | c.17270C>G        | p.Thr5757Arg | ENST00000423061 | MODERATE |
| 6     | 152623062 | missense_variant      | SYNE1     | rs150376715 | c.17483C>G        | p.Thr5828Arg | ENST00000367255 | MODERATE |
| 6     | 152647218 | missense_variant      | SYNE1     | rs35493783  | c.15100G>A        | p.Asp5034Asn | ENST00000423061 | MODERATE |
| 6     | 157488190 | missense_variant      | ARID1B    | rs34786733  | c.2896G>A         | p.Gly966Ser  | ENST00000346085 | MODERATE |
| 6     | 157522223 | missense_variant      | ARID1B    | rs34870395  | c.4456A>T         | p.Met1486Leu | ENST00000350026 | MODERATE |
| 7     | 12443318  | missense_variant      | VWDE      |             | c.25G>C           | p.Val9Leu    | ENST00000275358 | MODERATE |
| 7     | 134719612 | missense_variant      | AGBL3     |             | c.1270C>T         | p.Arg424Cys  | ENST00000436302 | MODERATE |
| 7     | 143096736 | splice_region_variant | EPHA1     | rs149923216 | c.835+8C>T        |              | ENST00000275815 | LOW      |
| 8     | 33361259  | splice_region_variant | TTI2      | rs199720231 | c.1115+7C>G       |              | ENST00000360742 | LOW      |
| 8     | 52384860  | missense_variant      | PXDNL     |             | c.699C>A          | p.Ser233Arg  | ENST00000356297 | MODERATE |
| 8     | 120814146 | missense_variant      | TAF2      |             | c.680A>G          | p.His227Arg  | ENST00000378164 | MODERATE |
| 8     | 141034062 | missense_variant      | TRAPPC9   |             | c.2671A>C         | p.Thr891Pro  | ENST00000438773 | MODERATE |
| 8     | 144995672 | missense_variant      | PLEC      | rs200683827 | c.8221G>A         | p.Ala2741Thr | ENST00000398774 | MODERATE |
| 9     | 13158047  | missense_variant      | MPDZ      |             | c.3422C>T         | p.Thr1141Ile | ENST00000541718 | MODERATE |
| 9     | 98677946  | splice_region_variant | ERCC6L2   | rs367808564 | c.822-4A>G        |              | ENST00000288985 | LOW      |
| 9     | 135940049 | missense_variant      | CEL       |             | c.249C>A          | p.Phe83Leu   | ENST00000372080 | MODERATE |
| 10    | 3187831   | missense_variant      | PITRM1    | rs34837384  | c.2120G>A         | p.Arg707Gln  | ENST00000451104 | MODERATE |
| 10    | 3214939   | missense_variant      | PITRM1    | rs199766052 | c.26G>T           | p.Gly9Val    | ENST00000380989 | MODERATE |
| 10    | 32856748  | frameshift_variant    | CCDC7     |             | c.1351_1354delAAC | p.Thr451fs   | ENST00000277657 | HIGH     |
| 10    | 37433935  | missense_variant      | ANKRD30A  |             | c.1238C>T         | p.Pro413Leu  | ENST00000361713 | MODERATE |
| 10    | 60562867  | missense_variant      | BICC1     | rs77500675  | c.2046A>T         | p.Glu682Asp  | ENST00000373886 | MODERATE |
| 11    | 20907067  | missense_variant      | NELL1     | rs115437355 | c.584A>G          | p.Gln195Arg  | ENST00000357134 | MODERATE |
| 11    | 34129870  | inframe_insertion     | NAT10     | rs139367378 | c.100_102dupAAA   | p.Lys34dup   | ENST00000257829 | MODERATE |
| 11    | 46766098  | missense_variant      | CKAP5     |             | c.5554G>A         | p.Val1852Met | ENST00000312055 | MODERATE |
| 11    | 62656158  | missense_variant      | SLC3A2    | rs201220940 | c.1583C>T         | p.Ala528Val  | ENST00000338663 | MODERATE |
| 11    | 65487790  | inframe_deletion      | RNASEH2C  | rs141875736 | c.268_270delAAG   | p.Lys90del   | ENST00000308418 | MODERATE |
| 12    | 57864531  | missense_variant      | GLI1      | rs138680284 | c.1624G>T         | p.Ala542Ser  | ENST00000543426 | MODERATE |
| 12    | 103246735 | splice_region_variant | PAH       | rs62508624  | c.707-7A>T        |              | ENST00000553106 | LOW      |
| 12    | 109702166 | missense_variant      | ACACB     | rs149917930 | c.6917G>A         | p.Arg2306Gln | ENST00000338432 | MODERATE |
| 13    | 25479878  | missense_variant      | CENPJ     | rs79951875  | c.2298T>A         | p.Asp766Glu  | ENST00000381884 | MODERATE |
| 13    | 44454253  | splice_region_variant | LACC1     | rs73465585  | c.-37C>A          |              | ENST00000325686 | LOW      |
| 15    | 42977810  | missense_variant      | STARD9    | rs140924205 | c.4034T>G         | p.Ile1345Ser | ENST00000290607 | MODERATE |
| 15    | 42978141  | missense_variant      | STARD9    | rs376229251 | c.4365A>C         | p.Glu1455Asp | ENST00000290607 | MODERATE |
| 15    | 42982583  | missense_variant      | STARD9    | rs115491632 | c.8807G>T         | p.Gly2936Val | ENST00000290607 | MODERATE |
| 15    | 75644499  | missense_variant      | NEIL1     |             | c.482T>C          | p.Ile161Thr  | ENST00000355059 | MODERATE |
| 15    | 84506964  | missense_variant      | ADAMTSL1  | rs112527144 | c.724A>G          | p.Lys242Glu  | ENST00000286744 | MODERATE |
| 16    | 27715275  | missense_variant      | KIAA0556  | rs143325975 | c.1345G>A         | p.Gly449Ser  | ENST00000261588 | MODERATE |
| 16    | 56875738  | missense_variant      | NUP93     | rs147381896 | c.1973G>A         | p.Arg658His  | ENST00000564887 | MODERATE |
| 16    | 67298319  | missense_variant      | SLC9A5    |             | c.1907T>G         | p.Val636Gly  | ENST00000299798 | MODERATE |
| 16    | 71571175  | missense_variant      | CHST4     | rs141141955 | c.595C>T          | p.His199Tyr  | ENST00000338482 | MODERATE |
| 17    | 649703    | missense_variant      | GEMIN4    |             | c.1580A>G         | p.Asn527Ser  | ENST00000319004 | MODERATE |
| 17    | 7671259   | missense_variant      | DNAH2     | rs146539788 | c.3717C>A         | p.Asp1239Glu | ENST00000389173 | MODERATE |
| 17    | 16068429  | missense_variant      | NCOR1     |             | c.155C>T          | p.Ser52Leu   | ENST00000395848 | MODERATE |
| 17    | 62024398  | splice_region_variant | SCN4A     | rs142270113 | c.3441+7G>A       |              | ENST00000435607 | LOW      |
| 19    | 8161433   | missense_variant      | FBN3      | rs115948457 | c.5434A>G         | p.Ile1812Val | ENST00000270509 | MODERATE |
| 19    | 9868536   | frameshift_variant    | ZNF846    |             | c.1213_1216delAAA | p.Asn405fs   | ENST00000397902 | HIGH     |
| 19    | 18256548  | splice_region_variant | MAST3     | rs73925428  | c.2953-5C>T       |              | ENST00000262811 | LOW      |
| 19    | 50037548  | missense_variant      | RCN3      |             | c.341T>A          | p.Ile114Lys  | ENST00000270645 | MODERATE |
| 19    | 50040307  | missense_variant      | RCN3      | rs77227069  | c.463G>A          | p.Val155Met  | ENST00000270645 | MODERATE |
